# Supplementary material for: The price of conserving avian phylogenetic diversity: a global prioritization approach
Source: PubMed Central journal article supplement (PMC4290418; doi:10.1098/rstb.2014.0004), 2015-02-19
Supplement: rstb20140004supp1.pdf [file rstb20140004supp1.pdf]

**Threat status, ADEPD scores (not taking into account complementarity), EDGE scores and estimated required and recent expenditure for the conservation of 206 globally threatened bird species.**

| Common Name                  | Scientific Name                    | IUCN Bird Red List 2013 | ADEPD score | EDGE score | Required Expenditure (US\$) | Recent Expenditure (US\$) |
|------------------------------|------------------------------------|-------------------------|-------------|------------|-----------------------------|---------------------------|
| Rufous-headed Hornbill       | <i>Aceros waldeni</i>              | CR                      | 4.01935     | 5.27014    | 11700000                    | 227000                    |
| Kiritimati Reed-warbler      | <i>Acrocephalus aequinoctialis</i> | EN                      | 0.22537     | 3.16048    | 2460000                     | 75000                     |
| Tahiti Reed-warbler          | <i>Acrocephalus caffer</i>         | EN                      | 0.27332     | 3.11996    | 1450000                     | 3400                      |
| Millerbird                   | <i>Acrocephalus familiaris</i>     | CR                      | 0.72116     | 3.98234    | 2700000                     | 1320000                   |
| Nightingale Reed-warbler     | <i>Acrocephalus luscinius</i>      | CR                      | 1.92455     | 4.52984    | 88200000                    | 3260000                   |
| Aquatic Warbler              | <i>Acrocephalus paludicola</i>     | VU                      | 0.25316     | 3.44313    | 330000000                   | 31900000                  |
| Purple-backed Sunbeam        | <i>Aglaeactis aliciae</i>          | EN                      | 1.47184     | 3.98658    | 612000                      | 9500                      |
| Raso Lark                    | <i>Alauda razae</i>                | CR                      | 1.6354      | 4.57759    | 514000                      | 42000                     |
| Chestnut-bellied Hummingbird | <i>Amazilia castaneiventris</i>    | EN                      | 0.81087     | 3.55238    | 2140000                     | 231000                    |
| Black-billed Amazon          | <i>Amazona agilis</i>              | VU                      | 0.24148     | 3.04237    | 11400000                    | 3240000                   |
| Tucuman Amazon               | <i>Amazona tucumana</i>            | VU                      | 0.10574     | 2.85307    | 4020000                     | 211000                    |
| Puerto Rican Amazon          | <i>Amazona vittata</i>             | CR                      | 1.1709      | 4.12403    | 27500000                    | 17200000                  |
| White-throated Grasswren     | <i>Amytornis woodwardi</i>         | VU                      | 0.12183     | 3.76683    | 15000000                    | 10800000                  |
| Ash-breasted Tit-tyrant      | <i>Anairetes alpinus</i>           | EN                      | 1.21003     | 3.83951    | 8240000                     | 992000                    |
| Auckland Islands Teal        | <i>Anas aucklandica</i>            | VU                      | 0.02893     | 2.39253    | 5490000                     | 0                         |
| Brown Teal                   | <i>Anas chlorotis</i>              | EN                      | 0.14459     | 3.08953    | 1200000                     | 3230000                   |
| Hawaiian Duck                | <i>Anas wyvilliana</i>             | EN                      | 0.56412     | 3.33374    | 9030000                     | 260000                    |
| Amani Sunbird                | <i>Anthreptes pallidigaster</i>    | EN                      | 1.69546     | 4.24002    | 29800000                    | 16500000                  |
| Nilgiri Pipit                | <i>Anthus nilghiriensis</i>        | VU                      | 0.16503     | 3.25948    | 4110000                     | 10000                     |
| Araripe Manakin              | <i>Antilophia bokermanni</i>       | CR                      | 1.01678     | 4.40679    | 12400000                    | 1470000                   |
| Yellow-throated Apalis       | <i>Apalis flavigularis</i>         | EN                      | 1.24639     | 3.86622    | 9520000                     | 1000000                   |
| Taita Apalis                 | <i>Apalis fuscigularis</i>         | CR                      | 1.82498     | 4.56293    | 2930000                     | 921000                    |
| Masafuera Rayadito           | <i>Aphrastura masafuerae</i>       | CR                      | 1.99158     | 4.79684    | 4140000                     | 86000                     |
| Southern Brown Kiwi          | <i>Apteryx australis</i>           | VU                      | 0.22485     | 4.26348    | 2330000                     | 1480000                   |
| Blue-throated Macaw          | <i>Ara glaucogularis</i>           | CR                      | 2.94924     | 4.52755    | 1250000                     | 1270000                   |
| Socorro Parakeet             | <i>Aratinga brevipes</i>           | EN                      | 1.18366     | 3.58211    | 5600000                     | 493000                    |
| Hainan Partridge             | <i>Arborophila ardens</i>          | VU                      | 0.12538     | 3.12413    | 2710000                     | 1440000                   |
| Great Indian Bustard         | <i>Ardeotis nigriceps</i>          | EN                      | 1.26966     | 5.07401    | 11100000                    | 1870000                   |
| Long-billed Tailorbird       | <i>Artisornis moreau</i>           | CR                      | 1.48871     | 4.70343    | 12300000                    | 2260000                   |

**Threat status, ADEPD scores (not taking into account complementarity), EDGE scores and estimated required and recent expenditure for the conservation of 206 globally threatened bird species.**

|                          |                                   |    |         |         |           |           |
|--------------------------|-----------------------------------|----|---------|---------|-----------|-----------|
| Pale-headed Brush-finch  | <i>Atlapetes pallidiceps</i>      | EN | 0.97326 | 3.59634 | 775000    | 373000    |
| Madagascar Pochard       | <i>Aythya innotata</i>            | CR | 0.44433 | 3.85209 | 2740000   | 857000    |
| White-bearded Antshrike  | <i>Biatas nigropectus</i>         | VU | 0.18257 | 3.34327 | 662000000 | 16500000  |
| Dwarf Olive Ibis         | <i>Bostrychia bocagei</i>         | CR | 4.82401 | 5.52702 | 9440000   | 956000    |
| Australasian Bittern     | <i>Botaurus poiciloptilus</i>     | EN | 2.33523 | 4.70586 | 13000000  | 932000    |
| Kittlitz's Murrelet      | <i>Brachyramphus brevirostris</i> | CR | 3.6651  | 5.05653 | 7800000   | 952000    |
| Grey-cheeked Parakeet    | <i>Brotogeris pyrrhoptera</i>     | EN | 1.17122 | 3.85902 | 10800000  | 104000    |
| Usambara Eagle-owl       | <i>Bubo vosseleri</i>             | VU | 0.21209 | 3.4447  | 13000000  | 16500000  |
| Southern Ground-hornbill | <i>Bucorvus cafer</i>             | VU | 0.38222 | 4.38494 | 8250000   | 93000     |
| Philippine Cockatoo      | <i>Cacatua haematuropygia</i>     | CR | 4.66378 | 4.97623 | 2740000   | 870000    |
| Yellow-crested Cockatoo  | <i>Cacatua sulphurea</i>          | CR | 1.21083 | 4.60642 | 2550000   | 681000    |
| Mangrove Finch           | <i>Camarhynchus heliobates</i>    | CR | 0.3102  | 3.54036 | 5690000   | 973000    |
| White-mantled Barbet     | <i>Capito hypoleucus</i>          | EN | 0.16376 | 3.3464  | 61700000  | 141000    |
| Bicknell's Thrush        | <i>Catharus bicknelli</i>         | VU | 0.07072 | 2.94187 | 22500000  | 3320000   |
| Gunnison Sage-grouse     | <i>Centrocercus minimus</i>       | EN | 0.26027 | 3.63662 | 14100000  | 1290000   |
| Esmeraldas Woodstar      | <i>Chaetocercus berlepschi</i>    | EN | 0.16158 | 2.99619 | 31200000  | 12500000  |
| St. HelenaPlover         | <i>Charadrius sanctaehelenae</i>  | CR | 4.55037 | 5.42525 | 5150000   | 968000    |
| Royal Cinclodes          | <i>Cinclodes aricomae</i>         | CR | 1.05201 | 4.03896 | 7230000   | 872000    |
| White-bellied Cinclodes  | <i>Cinclodes palliatus</i>        | CR | 0.7931  | 3.96252 | 3020000   | 18000     |
| Abbott's Starling        | <i>Cinnyricinclus femoralis</i>   | VU | 0.33407 | 3.65362 | 22600000  | 1030000   |
| Reunion Harrier          | <i>Circus maillardi</i>           | EN | 1.65951 | 4.06398 | 101000000 | 86500000  |
| Black Harrier            | <i>Circus maurus</i>              | VU | 0.19589 | 3.40719 | 11200000  | 87000     |
| Apolinar's Wren          | <i>Cistothorus apolinari</i>      | EN | 1.27839 | 4.0311  | 1900000   | 23000     |
| Golden White-eye         | <i>Cleptornis marchei</i>         | CR | 1.93796 | 4.43167 | 41000000  | 16900000  |
| Sangihe Shrike-thrush    | <i>Colluricincla sanghirensis</i> | CR | 3.48124 | 5.33329 | 1260000   | 815000    |
| Nilgiri Wood-pigeon      | <i>Columba elphinstonii</i>       | VU | 0.16896 | 4.74215 | 171000000 | 152000000 |
| Mariana Crow             | <i>Corvus kubaryi</i>             | CR | 1.21646 | 4.2988  | 29000000  | 12800000  |
| Brown Eared-pheasant     | <i>Crossoptilon mantchuricum</i>  | VU | 0.0046  | 2.74141 | 12600000  | 6290000   |
| Malherbe's Parakeet      | <i>Cyanoramphus malherbi</i>      | CR | 0.27379 | 3.91257 | 2940000   | 2340000   |
| Okinawa Woodpecker       | <i>Dendrocopos noguchii</i>       | CR | 0.85831 | 4.20686 | 49700000  | 3670000   |
| Cebu Flowerpecker        | <i>Dicaeum quadricolor</i>        | CR | 2.48594 | 4.92025 | 6300000   | 1010000   |
| Tooth-billed Pigeon      | <i>Didunculus strigirostris</i>   | EN | 9.75449 | 5.37124 | 695000    | 209000    |

**Threat status, ADEPD scores (not taking into account complementarity), EDGE scores and estimated required and recent expenditure for the conservation of 206 globally threatened bird species.**

|                                  |                                    |    |          |         |           |          |
|----------------------------------|------------------------------------|----|----------|---------|-----------|----------|
| Amsterdam Albatross              | <i>Diomedea amsterdamensis</i>     | CR | 0.64077  | 4.8218  | 712000    | 350000   |
| Chestnut-bellied Imperial-pigeon | <i>Ducula brenchleyi</i>           | VU | 0.19149  | 3.37688 | 10800000  | 1510000  |
| Bicoloured Antvireo              | <i>Dysithamnus occidentalis</i>    | VU | 0.16796  | 3.26237 | 9310000   | 2680000  |
| Bahia Tapaculo                   | <i>Eleoscytalopus psychopompus</i> | CR | 3.05993  | 5.26132 | 12100000  | 5490000  |
| Colourful Puffleg                | <i>Eriocnemis mirabilis</i>        | CR | 1.89478  | 4.55757 | 2930000   | 173000   |
| Black-breasted Puffleg           | <i>Eriocnemis nigrivestis</i>      | CR | 0.7985   | 4.40107 | 44000000  | 2380000  |
| Chilean Woodstar                 | <i>Eulidia yarrellii</i>           | EN | 0.78714  | 3.30104 | 2750000   | 159000   |
| Spoon-billed Sandpiper           | <i>Eurynorhynchus pygmeus</i>      | CR | 10.79867 | 5.80416 | 26500000  | 1010000  |
| Cerulean Paradise-flycatcher     | <i>Eutrichomyias rowleyi</i>       | CR | 1.21228  | 4.27553 | 1260000   | 815000   |
| Madagascar Serpent-eagle         | <i>Eutriorchis astur</i>           | EN | 11.81134 | 5.54404 | 5420000   | 236000   |
| Restinga Antwren                 | <i>Formicivora littoralis</i>      | EN | 1.01811  | 3.7339  | 7520000   | 207000   |
| Djibouti Francolin               | <i>Francolinus ochropectus</i>     | CR | 1.35209  | 4.37076 | 16900000  | 97000    |
| Swierstra's Francolin            | <i>Francolinus swierstrai</i>      | EN | 0.94203  | 3.6454  | 1140000   | 66000    |
| Christmas Island Frigatebird     | <i>Fregata andrewsi</i>            | CR | 7.88621  | 5.93714 | 1470000   | 244000   |
| Polynesian Ground-dove           | <i>Gallicolumba erythroptera</i>   | CR | 3.67077  | 5.11422 | 584000    | 126000   |
| Negros Bleeding-heart            | <i>Gallicolumba keayi</i>          | CR | 3.53034  | 5.0884  | 11000000  | 227000   |
| Madagascar Snipe                 | <i>Gallinago macrodactyla</i>      | VU | 0.19859  | 3.50872 | 20700000  | 7780000  |
| Okinawa Rail                     | <i>Gallirallus okinawae</i>        | EN | 1.4979   | 4.07452 | 26800000  | 5820000  |
| Blue-crowned Laughingthrush      | <i>Garrulax courtoisi</i>          | CR | 0.99975  | 4.19608 | 358000    | 67000    |
| Collared Laughingthrush          | <i>Garrulax yersini</i>            | EN | 0.72961  | 3.51651 | 1860000   | 783000   |
| Northern Bald Ibis               | <i>Geronticus eremita</i>          | CR | 2.94685  | 5.79345 | 12500000  | 3480000  |
| Cloud-forest Pygmy-owl           | <i>Glaucidium nubicola</i>         | VU | 0.19873  | 3.51228 | 17000000  | 59000    |
| Cundinamarca Antpitta            | <i>Grallaria kaestneri</i>         | EN | 1.8555   | 4.23066 | 3030000   | 45000    |
| Jocotoco Antpitta                | <i>Grallaria ridgelyi</i>          | EN | 1.85699  | 4.23822 | 5840000   | 1260000  |
| Siberian Crane                   | <i>Grus leucogeranus</i>           | CR | 4.10309  | 5.16165 | 46800000  | 30400000 |
| Black-necked Crane               | <i>Grus nigricollis</i>            | VU | 0.05115  | 3.25615 | 16100000  | 7750000  |
| California Condor                | <i>Gymnogyps californianus</i>     | CR | 12.74715 | 6.31036 | 103000000 | 54000000 |
| Crow Honeyeater                  | <i>Gymnomyza aubryana</i>          | CR | 2.47208  | 4.96298 | 29600000  | 10100000 |
| White-rumped Vulture             | <i>Gyps bengalensis</i>            | CR | 1.5315   | 4.6345  | 7640000   | 4340000  |
| Indian Vulture                   | <i>Gyps indicus</i>                | CR | 0.4958   | 4.39003 | 7640000   | 4340000  |
| Slender-billed Vulture           | <i>Gyps tenuirostris</i>           | CR | 0.51012  | 4.39245 | 7640000   | 4340000  |
| Black-cheeked Ant-tanager        | <i>Habia atrimaxillaris</i>        | EN | 1.584    | 4.04402 | 1410000   | 0        |

**Threat status, ADEPD scores (not taking into account complementarity), EDGE scores and estimated required and recent expenditure for the conservation of 206 globally threatened bird species.**

|                              |                                   |    |          |         |          |         |
|------------------------------|-----------------------------------|----|----------|---------|----------|---------|
| Madagascar Fish-eagle        | <i>Haliaeetus vociferoides</i>    | CR | 1.16291  | 5.01536 | 4090000  | 527000  |
| Munchique Wood-wren          | <i>Henicorhina negreti</i>        | CR | 1.82169  | 4.64574 | 4040000  | 114000  |
| Forest Owlet                 | <i>Heteroglaux blewitti</i>       | CR | 13.29361 | 5.99484 | 4110000  | 39000   |
| Liben Lark                   | <i>Heteromira fra sidamoensis</i> | CR | 2.65268  | 4.72465 | 1110000  | 396000  |
| Black Stilt                  | <i>Himantopus novaezelandiae</i>  | CR | 1.86359  | 5.08274 | 3630000  | 3280000 |
| Bengal Florican              | <i>Houbaropsis bengalensis</i>    | CR | 12.57593 | 6.00236 | 9700000  | 891000  |
| Grand Comoro Flycatcher      | <i>Humblotia flavirostris</i>     | EN | 1.34592  | 4.03283 | 1720000  | 514000  |
| Montserrat Oriole            | <i>Icterus oberi</i>              | CR | 1.08879  | 4.13744 | 2320000  | 26000   |
| Gabela Bush-shrike           | <i>Laniarius amboimensis</i>      | EN | 1.55805  | 4.05523 | 3600000  | 243000  |
| Sao Tome Fiscal              | <i>Lanius newtoni</i>             | CR | 1.67649  | 4.55747 | 9320000  | 338000  |
| Black-billed Gull            | <i>Larus bulleri</i>              | EN | 0.17846  | 3.05792 | 14800000 | 380000  |
| Galapagos Rail               | <i>Laterallus spilonotus</i>      | VU | 0.20157  | 3.48278 | 958000   | 8400    |
| Junin Rail                   | <i>Laterallus tuerosi</i>         | EN | 1.55046  | 4.18472 | 3140000  | 58000   |
| Sapphire-bellied Hummingbird | <i>Lepidopyga lilliae</i>         | CR | 0.43062  | 3.92895 | 2820000  | 54000   |
| White-browed Tit-spinetail   | <i>Leptasthenura xenothorax</i>   | EN | 0.76372  | 3.53703 | 2600000  | 872000  |
| White-collared Kite          | <i>Leptodon forbesi</i>           | CR | 3.39495  | 5.51539 | 1160000  | 58000   |
| Grenada Dove                 | <i>Leptotila wellsii</i>          | CR | 2.63501  | 4.88534 | 14500000 | 1500000 |
| Chinese Monal                | <i>Lophophorus lhuysii</i>        | VU | 0.20795  | 3.54722 | 1050000  | 618000  |
| Short-crested Coquette       | <i>Lophornis brachylophus</i>     | CR | 1.25269  | 4.39627 | 6180000  | 155000  |
| Akekee                       | <i>Loxops caeruleirostris</i>     | CR | 1.66335  | 4.279   | 29000000 | 2680000 |
| Akepa                        | <i>Loxops coccineus</i>           | EN | 1.7262   | 3.58585 | 25600000 | 9360000 |
| Zambian Barbet               | <i>Lybius chaplini</i>            | VU | 0.14504  | 3.19499 | 47900000 | 8440000 |
| Mountain Grackle             | <i>Macroagelaius subalaris</i>    | EN | 0.93233  | 3.72914 | 940000   | 15000   |
| Sharpe's Longclaw            | <i>Macronyx sharpei</i>           | EN | 1.4696   | 4.10363 | 4670000  | 124000  |
| Rufous-throated White-eye    | <i>Madanga ruficollis</i>         | EN | 0.54385  | 4.23944 | 7810000  | 36000   |
| Uluguru Bush-shrike          | <i>Malaconotus alius</i>          | CR | 3.55066  | 5.13182 | 7040000  | 216000  |
| Brazilian Merganser          | <i>Mergus octosetaceus</i>        | CR | 0.83959  | 4.18225 | 56700000 | 5400000 |
| Stresemann's Bristlefront    | <i>Merulaxis stresemanni</i>      | CR | 2.89097  | 5.23536 | 8950000  | 917000  |
| Perija Metaltail             | <i>Metallura iracunda</i>         | EN | 0.71271  | 3.66876 | 3350000  | 39000   |
| Socorro Mockingbird          | <i>Mimus graysoni</i>             | CR | 1.34829  | 4.34803 | 4140000  | 493000  |
| San Cristobal Mockingbird    | <i>Mimus melanotis</i>            | EN | 0.1899   | 3.46966 | 1750000  | 15000   |
| Floreana Mockingbird         | <i>Mimus trifasciatus</i>         | CR | 1.53388  | 4.41128 | 16900000 | 113000  |

**Threat status, ADEPD scores (not taking into account complementarity), EDGE scores and estimated required and recent expenditure for the conservation of 206 globally threatened bird species.**

|                            |                                  |    |          |         |           |          |
|----------------------------|----------------------------------|----|----------|---------|-----------|----------|
| Amber Mountain Rock-thrush | <i>Monticola erythronotus</i>    | EN | 0.23178  | 3.5417  | 1130000   | 1850000  |
| Puaiohi                    | <i>Myadestes palmeri</i>         | CR | 2.08106  | 4.70695 | 27800000  | 4590000  |
| Paria Redstart             | <i>Myioborus pariae</i>          | EN | 0.94016  | 3.4526  | 4930000   | 126000   |
| Alagoas Antwren            | <i>Myrmotherula snowi</i>        | CR | 2.41336  | 4.90171 | 3260000   | 824000   |
| Cherry-throated Tanager    | <i>Nemosia rourei</i>            | CR | 1.71707  | 4.79994 | 2930000   | 95000    |
| Banded Ground-cuckoo       | <i>Neomorphus radiolosus</i>     | EN | 2.71579  | 4.93039 | 8190000   | 451000   |
| Sao Tome Grosbeak          | <i>Neospiza concolor</i>         | CR | 1.75588  | 4.54925 | 9320000   | 962000   |
| Fearful Owl                | <i>Nesasio solomonensis</i>      | VU | 0.2073   | 3.58384 | 7610000   | 1320000  |
| Red-tailed Newtonia        | <i>Newtonia fanovanae</i>        | VU | 0.1864   | 3.50679 | 18900000  | 9800000  |
| Javan Hawk-eagle           | <i>Nisaetus bartelsi</i>         | EN | 0.71416  | 4.08565 | 861000    | 168000   |
| Akikiki                    | <i>Oreomystis bairdi</i>         | CR | 3.29298  | 4.73369 | 29700000  | 2680000  |
| Horned Guan                | <i>Oreophasis derbianus</i>      | EN | 4.40718  | 4.67628 | 324000000 | 678000   |
| Isabela Oriole             | <i>Oriolus isabellae</i>         | CR | 0.1717   | 4.5367  | 4540000   | 365000   |
| Anjouan Scops-owl          | <i>Otus capnodes</i>             | CR | 1.8929   | 4.56824 | 14700000  | 4750000  |
| Akohekohe                  | <i>Palmeria dolei</i>            | CR | 1.58144  | 4.38235 | 19900000  | 16400000 |
| Forty-spotted Pardalote    | <i>Pardalotus quadragintus</i>   | EN | 2.29284  | 4.71225 | 2940000   | 60000    |
| White-winged Guan          | <i>Penelope albipennis</i>       | CR | 0.7236   | 4.19277 | 3290000   | 1340000  |
| Black Robin                | <i>Petroica traversi</i>         | EN | 1.64789  | 4.53089 | 1270000   | 1170000  |
| Stewart Island Shag        | <i>Phalacrocorax chalconotus</i> | VU | 0.05973  | 3.27313 | 224000    | 0        |
| Chatham Islands Shag       | <i>Phalacrocorax onslowi</i>     | CR | 2.45511  | 4.85362 | 470000    | 130000   |
| Alagoas Foliage-gleaner    | <i>Philydor novaesi</i>          | CR | 0.91616  | 4.09015 | 3260000   | 824000   |
| Waved Albatross            | <i>Phoebastria irrorata</i>      | CR | 3.61476  | 5.24648 | 4390000   | 478000   |
| Urich's Tyrannulet         | <i>Phyllomyias urichi</i>        | EN | 1.6564   | 4.16687 | 5500000   | 105000   |
| White-necked Picathartes   | <i>Picathartes gymnocephalus</i> | VU | 0.33639  | 4.46713 | 4510000   | 77000    |
| Trinidad Piping-guan       | <i>Pipile pipile</i>             | CR | 0.13424  | 4.01481 | 4020000   | 60000    |
| Philippine Eagle           | <i>Pithecophaga jefferyi</i>     | CR | 13.47935 | 5.97685 | 21800000  | 3810000  |
| Banded Wattle-eye          | <i>Platysteira laticincta</i>    | EN | 1.81137  | 4.33114 | 4480000   | 2440000  |
| Golden-naped Weaver        | <i>Ploceus aureonucha</i>        | EN | 0.69844  | 3.44952 | 29400000  | 344000   |
| Clarke's Weaver            | <i>Ploceus golandi</i>           | EN | 0.7052   | 3.42594 | 12300000  | 3150000  |
| Usambara Weaver            | <i>Ploceus nicolli</i>           | EN | 0.68776  | 3.4456  | 41300000  | 1500000  |
| Junin Grebe                | <i>Podiceps taczanowskii</i>     | CR | 4.71685  | 5.51784 | 3060000   | 955000   |
| Iquitos Gnatcatcher        | <i>Polioptila clementsii</i>     | CR | 1.57802  | 4.50734 | 11200000  | 1150000  |

**Threat status, ADEPD scores (not taking into account complementarity), EDGE scores and estimated required and recent expenditure for the conservation of 206 globally threatened bird species.**

|                                |                                     |    |          |         |          |          |
|--------------------------------|-------------------------------------|----|----------|---------|----------|----------|
| Palawan Peacock-pheasant       | <i>Polyplectron napoleonis</i>      | VU | 0.27995  | 3.49173 | 16800000 | 13500000 |
| Tahiti Monarch                 | <i>Pomarea nigra</i>                | CR | 2.21979  | 4.45989 | 2050000  | 365000   |
| Fatuhiva Monarch               | <i>Pomarea whitneyi</i>             | CR | 1.14114  | 4.20523 | 85400000 | 158000   |
| White-throated Barbtail        | <i>Premnoplex tatei</i>             | VU | 0.21513  | 3.51752 | 7660000  | 64000    |
| White-shouldered Ibis          | <i>Pseudibis davisoni</i>           | CR | 4.59328  | 5.62554 | 7920000  | 729000   |
| Fiji Petrel                    | <i>Pseudobulweria macgillivrayi</i> | CR | 2.86806  | 4.86407 | 2540000  | 334000   |
| African Green Broadbill        | <i>Pseudocalyptomena graueri</i>    | VU | 1.03286  | 4.53705 | 59900000 | 1740000  |
| Maui Parrotbill                | <i>Pseudonestor xanthophrys</i>     | CR | 2.2094   | 4.43584 | 22000000 | 16400000 |
| Magenta Petrel                 | <i>Pterodroma magentae</i>          | CR | 1.86609  | 4.7048  | 4230000  | 531000   |
| Galapagos Petrel               | <i>Pterodroma phaeopygia</i>        | CR | 1.37065  | 4.63103 | 2810000  | 202000   |
| Falcated Wren-babbler          | <i>Ptilocichla falcata</i>          | VU | 0.06477  | 2.85344 | 13800000 | 1500000  |
| Townsend's Shearwater          | <i>Puffinus auricularis</i>         | CR | 2.50796  | 4.82297 | 7730000  | 679000   |
| Balearic Shearwater            | <i>Puffinus mauretanicus</i>        | CR | 2.02416  | 4.84906 | 6070000  | 735000   |
| El Oro Parakeet                | <i>Pyrrhura orcesi</i>              | EN | 0.62048  | 3.19681 | 2230000  | 2180000  |
| Santa Marta Parakeet           | <i>Pyrrhura viridicata</i>          | EN | 0.75098  | 3.25066 | 203000   | 36000    |
| Jerdon's Courser               | <i>Rhinoptilus bitorquatus</i>      | CR | 3.21989  | 5.32652 | 11800000 | 436000   |
| Thick-billed Parrot            | <i>Rhynchopsitta pachyrhyncha</i>   | EN | 3.04346  | 4.0526  | 1080000  | 23000    |
| Maroon-fronted Parrot          | <i>Rhynchopsitta terrisi</i>        | EN | 3.04346  | 4.0526  | 8180000  | 663000   |
| Gough Bunting                  | <i>Rowettia goughensis</i>          | CR | 2.06562  | 4.58893 | 6890000  | 159000   |
| Schouteden's Swift             | <i>Schoutedenapus schoutedeni</i>   | VU | 0.17595  | 3.65988 | 34600000 | 3030000  |
| Juan Fernandez Firecrown       | <i>Sephanoides fernandensis</i>     | CR | 2.29092  | 5.13221 | 7140000  | 189000   |
| Rubeho Akalat                  | <i>Sheppardia aurantiithorax</i>    | EN | 0.98988  | 4.05999 | 5520000  | 221000   |
| Worthen's Sparrow              | <i>Spizella wortheni</i>            | EN | 1.18321  | 3.83525 | 2150000  | 886000   |
| Botha's Lark                   | <i>Spizocorys fringillaris</i>      | EN | 1.24794  | 3.96391 | 71000    | 0        |
| Chinese Crested Tern           | <i>Sterna bernsteini</i>            | CR | 1.35688  | 4.50324 | 3010000  | 561000   |
| Kakapo                         | <i>Strigops habroptila</i>          | CR | 23.5638  | 6.28029 | 9380000  | 6930000  |
| Blackish-headed Spinetail      | <i>Synallaxis tithys</i>            | EN | 0.56272  | 3.32433 | 17500000 | 8150000  |
| Craveri's Murrelet             | <i>Synthliboramphus craveri</i>     | VU | 0.05085  | 3.28485 | 36500000 | 3250000  |
| Mount Kupe Bush-shrike         | <i>Telophorus kupeensis</i>         | EN | 2.047    | 4.3914  | 4550000  | 1430000  |
| Seychelles Paradise-flycatcher | <i>Terpsiphone corvina</i>          | CR | 1.1359   | 4.29325 | 2570000  | 1190000  |
| Giant Ibis                     | <i>Thaumatibis gigantea</i>         | CR | 31.89691 | 6.82656 | 6740000  | 157000   |
| Niceforo's Wren                | <i>Thryothorus nicefori</i>         | CR | 1.84019  | 4.63713 | 2180000  | 200000   |

**Threat status, ADEPD scores (not taking into account complementarity), EDGE scores and estimated required and recent expenditure for the conservation of 206 globally threatened bird species.**

|                           |                                 |    |         |         |          |          |
|---------------------------|---------------------------------|----|---------|---------|----------|----------|
| Sombre Kingfisher         | <i>Todiramphus funebris</i>     | VU | 0.14558 | 3.15831 | 7100000  | 6750000  |
| Tuamotu Kingfisher        | <i>Todiramphus gambieri</i>     | CR | 1.65795 | 4.54843 | 296000   | 444000   |
| Marquesan Kingfisher      | <i>Todiramphus godeffroyi</i>   | CR | 1.62218 | 4.52531 | 575000   | 725000   |
| Pemba Green-pigeon        | <i>Treron pembaensis</i>        | VU | 0.20587 | 3.48995 | 4010000  | 76000    |
| Timor Green-pigeon        | <i>Treron psittaceus</i>        | EN | 1.52224 | 4.09818 | 1450000  | 628000   |
| Sao Tome Green-pigeon     | <i>Treron sanctithomae</i>      | VU | 0.22339 | 3.51824 | 755000   | 755000   |
| Santa Marta Wren          | <i>Troglodytes monticola</i>    | CR | 1.54578 | 4.4932  | 859000   | 0        |
| Taita Thrush              | <i>Turdus helleri</i>           | CR | 2.75116 | 4.76912 | 5860000  | 1820000  |
| Buff-breasted Buttonquail | <i>Turnix olivii</i>            | EN | 2.71274 | 4.6099  | 566000   | 43000    |
| Sociable Lapwing          | <i>Vanellus gregarius</i>       | CR | 3.92744 | 5.23294 | 1490000  | 644000   |
| South Island Wren         | <i>Xenicus gilviventris</i>     | VU | 1.28355 | 4.97076 | 2530000  | 248000   |
| Spotted Ground-thrush     | <i>Zoothera guttata</i>         | EN | 3.6457  | 4.58583 | 18000000 | 3230000  |
| Mauritius Olive White-eye | <i>Zosterops chloronothus</i>   | CR | 0.60779 | 3.60925 | 2580000  | 642000   |
| Bridled White-eye         | <i>Zosterops conspicillatus</i> | EN | 0.43041 | 2.99083 | 42000000 | 15900000 |
| Sangihe White-eye         | <i>Zosterops nehrkorni</i>      | CR | 0.5516  | 3.5993  | 1260000  | 815000   |
| Rota Bridled White-eye    | <i>Zosterops rotensis</i>       | CR | 0.60189 | 3.67204 | 25800000 | 15700000 |
| Ranongga White-eye        | <i>Zosterops splendidus</i>     | VU | 0.02898 | 2.10127 | 968000   | 0        |
